# Supplementary material for: Fisher–Shannon Investigation of the Effect of Nonlinearity of Discrete Langevin Model on Behavior of Extremes in Generated Time Series
Source: MDPI journal article supplement (doi:10.3390/e25121650), 2023-12-12
Supplement: s1 [file s1]

# Fisher-Shannon investigation of the effect of nonlinearity of discrete Langevin model on behavior of extremes in generated time series. Supplementary information

Luciano Telesca <sup>1,\*</sup> and Zbigniew Czechowski <sup>2</sup>

<sup>1</sup> Institute of Methodologies for Environmental Analysis, National Research Council, 85050 Tito, Italy; luciano.telesca@imaa.cnr.it

<sup>2</sup> Institute of Geophysics, Polish Academy of Sciences, 01-452 Warsaw, Poland; zczech@igf.edu.pl

\* Correspondence: luciano.telesca@imaa.cnr.it (L.T.)

Considering discrete probability distributions ( $P = \{p_j : j = 1, \dots, M\}$ ), the FIM is defined as:

$$F[P] = F_0 \sum_{i=1}^{M-1} \left[ (p_{i+1})^{\frac{1}{2}} - (p_i)^{\frac{1}{2}} \right]^2 \quad (1)$$

The normalization constant is defined as:

$$F_0 = \begin{cases} 1 & \text{if } p_{i^*} = 1 \text{ for } i^* = 1 \text{ or } i^* = M \text{ and } p_i = 0 \quad \forall \quad i \neq i^* \\ \frac{1}{2} & \text{otherwise} \end{cases}$$

The normalization constant ensures that the maximum FIM is set to 1. In fact:

$$\begin{aligned} \sum_{i=1}^{M-1} \left[ (p_{i+1})^{\frac{1}{2}} - (p_i)^{\frac{1}{2}} \right]^2 &= \\ &= (\sqrt{p_1})^2 + 2(\sqrt{p_2})^2 + \dots + 2(\sqrt{p_{M-1}}) + (\sqrt{p_M})^2 + \\ &\quad - 2(\sqrt{p_1}\sqrt{p_2} + \sqrt{p_2}\sqrt{p_3} + \dots + \sqrt{p_{M-1}}\sqrt{p_M}) = \\ &= p_1 + 2p_2 + \dots + 2p_{M-1} + p_M + \\ &\quad - 2(\sqrt{p_1}\sqrt{p_2} + \sqrt{p_2}\sqrt{p_3} + \dots + \sqrt{p_{M-1}}\sqrt{p_M}) = \\ &= 1 + (p_2 + p_3 + \dots + p_{M-1}) + \\ &\quad - 2(\sqrt{p_1}\sqrt{p_2} + \sqrt{p_2}\sqrt{p_3} + \dots + \sqrt{p_{M-1}}\sqrt{p_M}) = \\ &= 1 + 1 - (p_1 + p_M) - 2(\sqrt{p_1}\sqrt{p_2} + \dots + \sqrt{p_{M-1}}\sqrt{p_M}) \leq 2 \end{aligned} \quad (2)$$

Thus

$$F[P] = F_0 \sum_{i=1}^{M-1} \left[ (p_{i+1})^{\frac{1}{2}} - (p_i)^{\frac{1}{2}} \right]^2 \leq 1 \quad (3)$$
